# Supplementary material for: Using organic fertilizers to increase crop yield, economic growth, and soil quality in a temperate farmland
Source: PeerJ. 2020 Aug 19;8:e9668. doi: 10.7717/peerj.9668 (PMC7443080; doi:10.7717/peerj.9668)
Supplement: Supplemental Information 1 [file peerj-08-9668-s001.xlsx]

## Sheet: Figure1
Date	Daily precipitation (mm)	Mean air temperature (℃)
2017-10-01	22.5	20.1
2017-10-02	0	20.9
2017-10-03	0.1	14.9
2017-10-04	0.1	13.6
2017-10-05	0	14.9
2017-10-06	0	16
2017-10-07	0	17.6
2017-10-08	0	21.7
2017-10-09	0	22.2
2017-10-10	7.4	18
2017-10-11	8.8	14
2017-10-12	8.9	13.1
2017-10-13	0	13.1
2017-10-14	0	14.7
2017-10-15	0	15.7
2017-10-16	0	17
2017-10-17	0.2	15.4
2017-10-18	0.9	13.8
2017-10-19	0	14.2
2017-10-20	0	14.2
2017-10-21	0	14.9
2017-10-22	0	14.8
2017-10-23	0	12.8
2017-10-24	0	11.6
2017-10-25	0	11.3
2017-10-26	0	14.6
2017-10-27	0	14.2
2017-10-28	0	15.3
2017-10-29	0	11.6
2017-10-30	0	8.5
2017-10-31	0	10.2
2017-11-01	0	13
2017-11-02	0	14.5
2017-11-03	0	13
2017-11-04	0	8.1
2017-11-05	0	8.7
2017-11-06	0	11.3
2017-11-07	0	12.9
2017-11-08	0	11.7
2017-11-09	0	13.5
2017-11-10	0	12.5
2017-11-11	0	7.8
2017-11-12	0	9.8
2017-11-13	0	11.5
2017-11-14	0	8.9
2017-11-15	0	7.4
2017-11-16	0	7.9
2017-11-17	0	10.9
2017-11-18	0	3.3
2017-11-19	0	1.7
2017-11-20	0	6
2017-11-21	0	5.1
2017-11-22	0	6.4
2017-11-23	0	3.6
2017-11-24	0	3.6
2017-11-25	0	6.2
2017-11-26	0	7.4
2017-11-27	0	5.6
2017-11-28	0	9.4
2017-11-29	0	4.9
2017-11-30	0	3.2
2017-12-01	0	1.9
2017-12-02	0	5.1
2017-12-03	0	4.3
2017-12-04	0	2.9
2017-12-05	0	0.6
2017-12-06	0	1.8
2017-12-07	0	2.7
2017-12-08	0	2
2017-12-09	0	3.1
2017-12-10	0	4.1
2017-12-11	0	1.3
2017-12-12	0	-1.4
2017-12-13	0	1.1
2017-12-14	0.5	0.2
2017-12-15	0	2.5
2017-12-16	0	-0.7
2017-12-17	0	-1.9
2017-12-18	0	0.7
2017-12-19	0	0.3
2017-12-20	0	0.8
2017-12-21	0	2.1
2017-12-22	0	3.3
2017-12-23	0	6.1
2017-12-24	0	4.6
2017-12-25	0	1.4
2017-12-26	0	1.6
2017-12-27	0	3.2
2017-12-28	0	4.4
2017-12-29	0	3
2017-12-30	0.6	5.2
2017-12-31	0	2
2018-01-01	0	1.3
2018-01-02	0	3.3
2018-01-03	0	0.8
2018-01-04	2.8	-1.7
2018-01-05	0.5	-2.5
2018-01-06	0	-1.4
2018-01-07	2.4	0.4
2018-01-08	0.5	0.1
2018-01-09	0	-0.9
2018-01-10	0	-2.1
2018-01-11	0	-4.7
2018-01-12	0	-5.4
2018-01-13	0	-1.3
2018-01-14	0	3
2018-01-15	0	3.1
2018-01-16	2.1	4.1
2018-01-17	0	4.1
2018-01-18	0	3.7
2018-01-19	0	2.9
2018-01-20	0	1.9
2018-01-21	0	2.4
2018-01-22	0	2
2018-01-23	0	-2.9
2018-01-24	0	-4.9
2018-01-25	0	-4.1
2018-01-26	0	-5.9
2018-01-27	0.4	-5.6
2018-01-28	0.4	-4.9
2018-01-29	0	-4.6
2018-01-30	0	-1.6
2018-01-31	0	0.8
2018-02-01	0	-0.8
2018-02-02	0	-2
2018-02-03	0	-4.5
2018-02-04	0	-3.7
2018-02-05	0	-1.8
2018-02-06	0	-3.8
2018-02-07	0	-1.5
2018-02-08	0	-2.1
2018-02-09	0	2.6
2018-02-10	0	1.5
2018-02-11	0	-2.1
2018-02-12	0	-0.9
2018-02-13	0	4
2018-02-14	0	5.9
2018-02-15	0	2.4
2018-02-16	0	2.8
2018-02-17	0	3
2018-02-18	0	4.3
2018-02-19	0	4.4
2018-02-20	0	3.7
2018-02-21	2.8	2.1
2018-02-22	0	4.9
2018-02-23	0	8.4
2018-02-24	0	4.3
2018-02-25	0	4.3
2018-02-26	0	7.3
2018-02-27	0	9.8
2018-02-28	0.5	9.5
2018-03-01	0	6.8
2018-03-02	0	7.4
2018-03-03	0	9.9
2018-03-04	37.5	9
2018-03-05	0	4.9
2018-03-06	0	4
2018-03-07	0	4.4
2018-03-08	0	4.4
2018-03-09	0	3.7
2018-03-10	0	9.5
2018-03-11	0	12.5
2018-03-12	0	15
2018-03-13	0	17.8
2018-03-14	0	18.3
2018-03-15	0	11
2018-03-16	0	6
2018-03-17	0	5.5
2018-03-18	8.4	7
2018-03-19	0	8.5
2018-03-20	0	5.8
2018-03-21	0	7.5
2018-03-22	0	8.4
2018-03-23	0	13
2018-03-24	3.9	15
2018-03-25	0	15.7
2018-03-26	0	17.5
2018-03-27	0	19.7
2018-03-28	0	21.7
2018-03-29	0	18.1
2018-03-30	0	15.4
2018-03-31	0	16.5
2018-04-01	0	19.1
2018-04-02	0	21.9
2018-04-03	0	17.1
2018-04-04	0	9.1
2018-04-05	1.8	6.5
2018-04-06	0	8.1
2018-04-07	0	9.1
2018-04-08	0	15.2
2018-04-09	0	17.7
2018-04-10	0	21.1
2018-04-11	0	20.1
2018-04-12	7.4	13.7
2018-04-13	2.3	12.2
2018-04-14	2.1	11.2
2018-04-15	0	13.7
2018-04-16	0	14.8
2018-04-17	0	15.8
2018-04-18	0	18.6
2018-04-19	0	22.3
2018-04-20	0	21.9
2018-04-21	0
2018-04-22	0.3	17.9
2018-04-23	0	15.3
2018-04-24	0	17.2
2018-04-25	0	18
2018-04-26	0	19.8
2018-04-27	0	22.2
2018-04-28	0	23.2
2018-04-29	0	23.4
2018-04-30	0	24.8
2018-05-01	8	20.6
2018-05-02	0	18.4
2018-05-03	0	18.8
2018-05-04	0	20.9
2018-05-05	4.7	18.9
2018-05-06	1.1	18.3
2018-05-07	0
2018-05-08	0	22.2
2018-05-09	0	19.9
2018-05-10	0	18.1
2018-05-11	0	16.2
2018-05-12	0	19.4
2018-05-13	0	24.2
2018-05-14	0	26.2
2018-05-15	0	27.6
2018-05-16	0	25.9
2018-05-17	5.2	25.6
2018-05-18	0	23.6
2018-05-19	0	21.7
2018-05-20	2.2	16.8
2018-05-21	0	17.4
2018-05-22	12.6	17
2018-05-23	0	20.9
2018-05-24	0	21.6
2018-05-25	0	20.5
2018-05-26	0	21.6
2018-05-27	0	24.3
2018-05-28	0	27.4
2018-05-29	0	26.4
2018-05-30	0	25.9
2018-05-31	0	27
2018-06-01	0	25.5
2018-06-02	0	24
2018-06-03	0	25.6
2018-06-04	4.6	24.4
2018-06-05	0	27.7
2018-06-06	0	28.8
2018-06-07	0	29.2
2018-06-08	0	28.5
2018-06-09	0.8	22.3
2018-06-10	2	20.6
2018-06-11	1.4	23.7
2018-06-12	0	28.6
2018-06-13	20.5	27.4
2018-06-14	0.2	24.8
2018-06-15	0	25.1
2018-06-16	0	24.2
2018-06-17	0	24.7
2018-06-18	0	24.2
2018-06-19	2.4	24.3
2018-06-20	0	27.5
2018-06-21	0	28.9
2018-06-22	0	27.8
2018-06-23	0	26.9
2018-06-24	0	28
2018-06-25	20.7	25.7
2018-06-26	81.6	25.8
2018-06-27	0	28.7
2018-06-28	13.8	27.8
2018-06-29	0	27.1
2018-06-30	0	26.3
2018-07-01	0	26.1
2018-07-02	0	24.5
2018-07-03	0	27.1
2018-07-04	2.2	26.9
2018-07-05	0	26.7
2018-07-06	0	26.9
2018-07-07	0	26.4
2018-07-08	0	24
2018-07-09	11.6	22.9
2018-07-10	13	23.5
2018-07-11	7	26.9
2018-07-12	0	28.4
2018-07-13	0	30
2018-07-14	0	31.8
2018-07-15	0	32.2
2018-07-16	0	31.1
2018-07-17	0	30.3
2018-07-18	0	31.6
2018-07-19	0	30.5
2018-07-20	0	30.3
2018-07-21	0	30
2018-07-22	0	29.6
2018-07-23	21.5	26.7
2018-07-24	0	30.5
2018-07-25	0	32.4
2018-07-26	4.8	29.3
2018-07-27	2.1	28
2018-07-28	0	28.8
2018-07-29	32	25.8
2018-07-30	0.8	27.3
2018-07-31	0	29.8
2018-08-01	0	30.6
2018-08-02	0	30.8
2018-08-03	0	30.1
2018-08-04	6.1	27.8
2018-08-05	0.2	30
2018-08-06	0	30.3
2018-08-07	0	31.4
2018-08-08	0	31.9
2018-08-09	0	31.1
2018-08-10	0	30.5
2018-08-11	0	29.7
2018-08-12	0	28.9
2018-08-13	13	27.5
2018-08-14	17.7	28.1
2018-08-15	0	28.1
2018-08-16	0	28.1
2018-08-17	4.9	26.9
2018-08-18	31.1	25.6
2018-08-19	87.7	25.8
2018-08-20	1.3	25.9
2018-08-21	0	26.5
2018-08-22	0.1	26.5
2018-08-23	0.1	26.5
2018-08-24	0	26.4
2018-08-25	0	26.5
2018-08-26	0	25.8
2018-08-27	1.2	25.1
2018-08-28	1.4	27.8
2018-08-29	11.4	28.8
2018-08-30	54.5	26.7
2018-08-31	0	25.1
2018-09-01	0	25.8
2018-09-02	0	25.2
2018-09-03	17	27.1
2018-09-04	0	25.2
2018-09-05	0	24.2
2018-09-06	0	25.2
2018-09-07	0	22.9
2018-09-08	0	22.1
2018-09-09	0	22.1
2018-09-10	0	21.3
2018-09-11	0	22.3
2018-09-12	0	22.9
2018-09-13	0	24.5
2018-09-14	0	22.7
2018-09-15	0	21.5
2018-09-16	0.2	20.4
2018-09-17	0	21.5
2018-09-18	2	21.9
2018-09-19	28.9	20.2
2018-09-20	3.4	22
2018-09-21	0	22.9
2018-09-22	0	22.2
2018-09-23	0	19.7
2018-09-24	0	19.3
2018-09-25	0	18.4
2018-09-26	0	19.1
2018-09-27	0	18.5
2018-09-28	0	20.9
2018-09-29	0	20.3
2018-09-30	0	19.1
2018-10-01	0	18.6
2018-10-02	0	18.7
2018-10-03	0	18.4
2018-10-04	0	18.3
2018-10-05	0	19.2
2018-10-06	0	19.5
2018-10-07	0	17.6
2018-10-08	0	17.4
2018-10-09	0	17.3
2018-10-10	0	12.5
2018-10-11	0	12.3
2018-10-12	0	12.7
2018-10-13	0	13.7
2018-10-14	0	14.1
2018-10-15	0	14
2018-10-16	0	15.4
2018-10-17	0	15
2018-10-18	0	12.5
2018-10-19	0	11.6
2018-10-20	0	12.5
2018-10-21	0	13.7
2018-10-22	0.11	15.6
2018-10-23	0	15.4
2018-10-24	0	14.8
2018-10-25	0	15.9
2018-10-26	0	14.3
2018-10-27	0	11.5
2018-10-28	0	13.5
2018-10-29	0	13.4
2018-10-30	0	11.4
2018-10-31	0	11.8
2018-11-01	0	11.5
2018-11-02	0	11.6
2018-11-03	0	11.5
2018-11-04	0	13.3
2018-11-05	4.5	12.7
2018-11-06	9	8.2
2018-11-07	1	8.6
2018-11-08	13.9	7.3
2018-11-09	0	8.9
2018-11-10	0	10.1
2018-11-11	1.8	12.1
2018-11-12	0	11.5
2018-11-13	0	10
2018-11-14	0	9.7
2018-11-15	0	11.7
2018-11-16	0	9.6
2018-11-17	0	5.8
2018-11-18	0	7.7
2018-11-19	0	6.2
2018-11-20	0	6.3
2018-11-21	0	8.9
2018-11-22	0	5.3
2018-11-23	0	6.7
2018-11-24	0	7.3
2018-11-25	0	8.3
2018-11-26	0	9.8
2018-11-27	0	9.4
2018-11-28	0	10.8
2018-11-29	0	9.5
2018-11-30	0	9
2018-12-01	0
2018-12-02	7	13
2018-12-03	5.5	10.9
2018-12-04	9.5	5.9
2018-12-05	6	2
2018-12-06	4.4	1.6
2018-12-07	0	-2.4
2018-12-08	0	-3.7
2018-12-09	0	-3.5
2018-12-10	0	-0.7
2018-12-11	2.7	-0.7
2018-12-12	0	-2.3
2018-12-13	0	-0.2
2018-12-14	0	-0.3
2018-12-15	0	0.2
2018-12-16	0	3.3
2018-12-17	0
2018-12-18	0	3.7
2018-12-19	0	5
2018-12-20	0	6.3
2018-12-21	0	7.9
2018-12-22	0	6.9
2018-12-23	0	3.6
2018-12-24	0	1.5
2018-12-25	0	4.5
2018-12-26	0	1.6
2018-12-27	0	-2.6
2018-12-28	0	-6.7
2018-12-29	0	-5.6
2018-12-30	0	-5.8
2018-12-31	0	-4
2019-01-01	0	-3.3
2019-01-02	0	-2.8
2019-01-03	0	-1.4
2019-01-04	3.6	0.6
2019-01-05	0	0.4
2019-01-06	0	-0.7
2019-01-07	0	-0.2
2019-01-08	0	-0.3
2019-01-09	0.2	-1.8
2019-01-10	0.4	-1.4
2019-01-11	0.9	0.2
2019-01-12	0	2.1
2019-01-13	0	-0.1
2019-01-14	0	1
2019-01-15	0	-0.6
2019-01-16	0	-3.3
2019-01-17	0	-0.4
2019-01-18	0	-0.1
2019-01-19	0	3.5
2019-01-20	0	1.1
2019-01-21	0	1.7
2019-01-22	0	2.2
2019-01-23	0	3.3
2019-01-24	0	3.5
2019-01-25	0	4.1
2019-01-26	0	0.2
2019-01-27	0	1.9
2019-01-28	0	4
2019-01-29	0	2.6
2019-01-30	3.7	3.3
2019-01-31	6.7	0.5
2019-02-01	0	0.1
2019-02-02	0	-0.1
2019-02-03	0	3.2
2019-02-04	0	2.7
2019-02-05	0	5.1
2019-02-06	0	4.5
2019-02-07	0	-0.7
2019-02-08	0	-4
2019-02-09	0	-1.1
2019-02-10	1.7	-3
2019-02-11	0	-0.2
2019-02-12	0	0.5
2019-02-13	0	0.7
2019-02-14	0.7	-1
2019-02-15	0	1.7
2019-02-16	0	-0.1
2019-02-17	0	1.1
2019-02-18	1.6	1.3
2019-02-19	2.1	1.9
2019-02-20	0	3.1
2019-02-21	0	3.1
2019-02-22	0	5.6
2019-02-23	0	5.4
2019-02-24	0	6.2
2019-02-25	0	6.9
2019-02-26	0	5
2019-02-27	0.2	5.3
2019-02-28	0	6.5
2019-03-01	0	7.1
2019-03-02	0	7.5
2019-03-03	0	7.5
2019-03-04	0	8.4
2019-03-05	0	10
2019-03-06	0	9.1
2019-03-07	0	6.6
2019-03-08	0	7.8
2019-03-09	0	7.9
2019-03-10	0	8.6
2019-03-11	0.1	12
2019-03-12	0	8.8
2019-03-13	0	8.5
2019-03-14	0	12
2019-03-15	0	11.4
2019-03-16	0	12.6
2019-03-17	0	12.9
2019-03-18	0	13.8
2019-03-19	0	15.8
2019-03-20	10	11.8
2019-03-21	0	11.6
2019-03-22	0	8.4
2019-03-23	0	9.6
2019-03-24	0	10.4
2019-03-25	0	13.6
2019-03-26	0	16.1
2019-03-27	0	18.3
2019-03-28	0	11.2
2019-03-29	0	8.7
2019-03-30	0	9.4
2019-03-31	0	9.5
2019-04-01	0	12.1
2019-04-02	0	12.1
2019-04-03	0	12.5
2019-04-04	0	14.6
2019-04-05	0	17.4
2019-04-06	0	18.6
2019-04-07	0	15.5
2019-04-08	0	13.3
2019-04-09	17.4	7.3
2019-04-10	0	10.6
2019-04-11	0	12.3
2019-04-12	0	12.2
2019-04-13	0	16.7
2019-04-14	11.9	16.2
2019-04-15	0	15.4
2019-04-16	0	16.1
2019-04-17	0	19.2
2019-04-18	0	20.5
2019-04-19	0	15.1
2019-04-20	0	16.6
2019-04-21	0	17.8
2019-04-22	0	16.9
2019-04-23	4.8	18.1
2019-04-24	0.8	17.7
2019-04-25	8.1	13.1
2019-04-26	0.2	12.2
2019-04-27	1	11.3
2019-04-28	5.4	11.3
2019-04-29	2.5	14.2
2019-04-30	0	18.2
2019-05-01	0	19.7
2019-05-02	0	20
2019-05-03	0	20.3
2019-05-04	0	20.8
2019-05-05	0	20.3
2019-05-06	0	17.2
2019-05-07	0	18.4
2019-05-08	0	17.4
2019-05-09	0	20
2019-05-10	0	21.1
2019-05-11	1.8	22.4
2019-05-12	0	23.8
2019-05-13	0	20.5
2019-05-14	0	20.4
2019-05-15	0	22.3
2019-05-16	0	22.3
2019-05-17	0	19.9
2019-05-18	0	19.5
2019-05-19	0	21.7
2019-05-20	0	21.3
2019-05-21	0	22.8
2019-05-22	0	26.9
2019-05-23	0	30.4
2019-05-24	0	29.2
2019-05-25	0	27.2
2019-05-26	0.7	22.6
2019-05-27	0.6	22.5
2019-05-28	0	22.6
2019-05-29	0	24
2019-05-30	0.8	20.7
2019-05-31	0	23.4
2019-06-01	0	26
2019-06-02	0	27.4
2019-06-03	0	30
2019-06-04	0	31.3
2019-06-05	0	27.2
2019-06-06	9.1	21.1
2019-06-07	0	23.7
2019-06-08	0	25.8
2019-06-09	0	27.2
2019-06-10	0	26.3
2019-06-11	0	26.7
2019-06-12	0	25.5
2019-06-13	0	24.1
2019-06-14	0	26.4
2019-06-15	0	28.3
2019-06-16	0	26.6
2019-06-17	0	27.9
2019-06-18	0	29.1
2019-06-19	0	27.6
2019-06-20	0	27.9
2019-06-21	0	29
2019-06-22	0	29.2
2019-06-23	0	28.1
2019-06-24	0	27.7
2019-06-25	0	25.2
2019-06-26	0	24.5
2019-06-27	0	27
2019-06-28	8.3	25.4
2019-06-29	0.9	26.9
2019-06-30	5.1	26.9
2019-07-01	0	29.2
2019-07-02	0	29.6
2019-07-03	0	30.7
2019-07-04	0	29.4
2019-07-05	0	29.8
2019-07-06	48.1	24.8
2019-07-07	1.6	22.3
2019-07-08	0	24.4
2019-07-09	0	25.1
2019-07-10	58.8	23.3
2019-07-11	32.5	22.6
2019-07-12	67.6	23.3
2019-07-13	1.2	26.1
2019-07-14	21.1	25.2
2019-07-15	0.2	27
2019-07-16	0	28
2019-07-17	0	25.6
2019-07-18	0	26
2019-07-19	2	26.4
2019-07-20	0	28.6
2019-07-21	0	30.9
2019-07-22	0	31.4
2019-07-23	7	29.4
2019-07-24	0.2	29.9
2019-07-25	0.3	29.6
2019-07-26	0	30.9
2019-07-27	4.8	28.4
2019-07-28	9.2	29.3
2019-07-29	0.1	30.6
2019-07-30	0	28.6
2019-07-31	0	28.9
2019-08-01	16.5	25.6
2019-08-02	37.4	25.9
2019-08-03	0	28.3
2019-08-04	0	27.9
2019-08-05	54	25.6
2019-08-06	51.1	26
2019-08-07	24.8	25.6
2019-08-08	103.3	27.8
2019-08-09	0.8	28.3
2019-08-10	42.4	25.4
2019-08-11	168.2	23.1
2019-08-12	10.6	23.5
2019-08-13	0	24.6
2019-08-14	0	25.5
2019-08-15	0	26.7
2019-08-16	0.5	26.8
2019-08-17	0	25.4
2019-08-18	0	25.9
2019-08-19	0	25.9
2019-08-20	0	25.4
2019-08-21	0.3	23.4
2019-08-22	0	26.5
2019-08-23	0	26.7
2019-08-24	0	25.5
2019-08-25	0	26.2
2019-08-26	0	24.9
2019-08-27	0	25.8
2019-08-28	0	26.5
2019-08-29	0	25.2
2019-08-30	0	24.4
2019-08-31	0	25.1
2019-09-01	0	25.1
2019-09-02	0	25.2
2019-09-03	0	23.2
2019-09-04	0	23.2
2019-09-05	0	24.8
2019-09-06	0	25.5
2019-09-07	0	26
2019-09-08	0	26.6
2019-09-09	0	25.9
2019-09-10	0	26.3
2019-09-11	0	24.7
2019-09-12	0.9	21.7
2019-09-13	0	24.4
2019-09-14	0	25.6
2019-09-15	0	22.5
2019-09-16	0	22.9
2019-09-17	0	22.6
2019-09-18	0	22.4
2019-09-19	0	19.7
2019-09-20	0	21.4
2019-09-21	0	22.5
2019-09-22	0	22.6
2019-09-23	0	22
2019-09-24	0	22.9
2019-09-25	0	23.9
2019-09-26	0	22.9
2019-09-27	0	22.8
2019-09-28	0	23.7
2019-09-29	0	23.6
2019-09-30	0	22.8
2019-10-01	0	22.2

## Sheet: Figure2
	wheat (kg ha-1)		maize (kg ha-1)
year	2018	2019	2018	2019
CK1	3181.8	1749.96	3583.02	2198.89
CK2	3058.93	1849.96	4051.7	2041.83
CK3	3663.7	2249.96	3781.45	1799.09
RSMT1	5602.99	5333.28	7010.24	5305.18
RSMT2	7145.49	4749.96	7623	5503.49
RSMT3	6355.47	4874.96	7422.11	5225.85
SBMT1	7302.96	7999.92	7500.16	7775.86
SBMT2	8105.47	7139.93	8989.9	8256.57
SBMT3	7287.95	7899.92	8409.49	8352.71
CMT1	7813.03	7299.93	8094.33	7139.25
CMT2	6692.97	6849.95	8432.7	7186.85
CMT3	7855.46	6629.94	8155.5	7234.44

## Sheet: Figure3
2018
Peak Name	18:2 w6c	18:3 w6c	20:1 w9c	14:00:00	15:00:00	16:00:00	17:00:00	18:00:00	15:1 iso w6c	16:1 w7c	16:1 w9c	17:0 cyclo w7c	17:1 w8c	18:1 w7c	18:1 w9c	19:0 cyclo w7c	14:0 iso	14:1 w5c	15:0 iso	16:0 anteiso	16:0 iso	17:0 anteiso	17:0 iso	16:0 10-methyl	17:0 10-methyl	18:0 10-methyl	16:1 w5c
CK1	0.476699	0.045242	0.0619201	0.234652	0.135696	2.17178	0.122337	0.47015	0.140838	0.668635	0.0989419	0.436691	0.0812572	0.783134	0.512346	0.392322	0.173268	0.712103	1.21045	0.0541279	0.482656	0.304385	0.405847	0.356751	0.0950248	0.23652	0.427114
CK2	0.563901	0.0516977	0.0658695	0.199305	0.129667	2.27133	0.123951	0.509999	0.117208	0.680359	0.0977534	0.418637	0.0821375	0.82588	0.549945	0.40403	0.157829	0.712605	1.1977	0.056206	0.484811	0.298056	0.410327		0.092183	0.265727	0.4203
CK3	0.31807	0.0285436	0.0349093	0.0941183	0.0837098	1.32099	0.074869	0.314032	0.0649027	0.358378	0.0554126	0.259899	0.041619	0.382485	0.316037	0.254491	0.0822732	0.40236	0.671522	0.0273305	0.26983	0.166317	0.238328	0.3891	0.0567298	0.162977	0.205284
RSMT1	0.414499	0.036997	0.0574103	0.190556	0.122289	2.1173	0.109666	0.457664	0.111149	0.665033	0.0996177	0.405566	0.0830164	0.776825	0.511852	0.388972	0.156196	0.704107	1.15854	0.046886	0.444618	0.127917	0.380089	0.632503	0.0853275	0.298571	0.41541
RSMT2	0.476699	0.045242	0.0619201	0.234652	0.135696	2.17178	0.122337	0.47015	0.140838	0.668635	0.0989419	0.436691	0.0812572	0.783134	0.512346	0.392322	0.173268	0.712103	1.21045	0.0541279	0.482656	0.304385	0.405847	0.356751	0.0950248	0.23652	0.427114
RSMT3	0.563901	0.0516977	0.0658695	0.199305	0.129667	2.27133	0.123951	0.509999	0.117208	0.680359	0.0977534	0.418637	0.0821375	0.82588	0.549945	0.40403	0.157829	0.712605	1.1977	0.056206	0.484811	0.298056	0.410327		0.092183	0.265727	0.4203
SBMT1	0.372533	0.0643198	0.069334	0.226995	0.138635	2.53587	0.133076	0.576043	0.135988	0.865583	0.152472	0.525401	0.105817	0.865445	0.647054	0.450276	0.191443	0.89423	1.56447	0.0600981	0.565423	0.351236	0.439997	0.906243	0.128056	0.40732	0.506179
SBMT2	0.510071	0.0604976	0.0971188	0.270611	0.166224	3.29162	0.169888	0.720696	0.182263	1.23354	0.201122	0.723404	0.135572	1.26862	0.915664	0.654751	0.216968	1.18556	2.08184	0.063988	0.739016	0.458033	0.601346	1.29599	0.165533	0.420527	0.6923
SBMT3	0.370635	0.0570254	0.0740842	0.221431	0.14537	2.5574	0.148946	0.552679	0.138825	0.904694	0.149138	0.531623	0.1072	0.881078	0.652964	0.417874	0.195019	0.951623	1.62849	0.0669552	0.584817	0.371322	0.455338	0.927734	0.133019	0.410289	0.52101
CMT1	0.339128	0.0546201	0.0692318	0.204491	0.139731	2.17656	0.130442	0.461997	0.152561	0.807592	0.132356	0.465919	0.0874818	0.759243	0.52719	0.370543	0.206809	0.776678	1.26141	0.0576383	0.461429	0.313035	0.382236	0.709215	0.098139	0.308686	0.471742
CMT2	0.466618	0.0552689	0.0929952	0.245917	0.186568	2.75764	0.1765	0.576939	0.150536	0.997993	0.162571	0.574627	0.111999	0.957166	0.690883	0.465652	0.271465	0.985489	1.65403	0.0704141	0.614865	0.401205	0.466199	0.903425	0.118348	0.325406	0.591441
CMT3	0.414551	0.0504488	0.0780436	0.237866	0.143235	2.63956	0.137018	0.540024	0.134926	0.976376	0.142894	0.540731	0.104643	0.90981	0.630955	0.438817	0.231617	0.976579	1.59463	0.0628549	0.589843	0.381424	0.450651		0.12029	0.393352	0.572434
2019
Peak Name	18:2 w6c	18:3 w6c	20:1 w9c	14:00:00	15:00:00	16:00:00	17:00:00	18:00:00	15:1 iso w6c	16:1 w7c	16:1 w9c	17:0 cyclo w7c	17:1 w8c	18:1 w7c	18:1 w9c	19:0 cyclo w7c	14:0 iso	15:0 anteiso	15:0 iso	16:0 anteiso	16:0 iso	17:0 anteiso	17:0 iso	16:0 10-methyl	17:0 10-methyl	18:0 10-methyl	16:1 w5c
CK1	0.32311	0.124389	0.0295795	0.147145	0.123163	1.6317	0.111503	0.373156	0.100531	0.647149	0.122088	0.44206	0.0991267	0.638541	0.548983	0.419698	0.128451	0.723246	1.18308	0.07317	0.574755	0.323553	0.322471	0.824904	0.132634	0.304217	0.368702
CK2	0.200752	0.144522	0.0353687	0.137025	0.106801	1.19277	0.0855769	0.302032	0.0956142	0.420606	0.100267	0.308546	0.080767	0.382486	0.418309	0.344793	0.102517	0.495162	0.968407	0.0729756	0.432064	0.225359	0.249594	0.624173	0.0964158	0.207897	0.262876
CK3	0.176566	0.0959257		0.0894473	0.0820206	1.00253	0.0807893	0.24831	0.0582154	0.345549	0.0778273	0.264428	0.0739635	0.348248	0.376915	0.342605	0.0753179	0.427685	0.823422	0.0568332	0.356041	0.204627	0.226839	0.547785	0.087344	0.183557	0.207288
RSMT1	0.304192	0.152385	0.047914	0.189419	0.14268	1.67929	0.127807	0.413252	0.125239	0.620641	0.131827	0.441899	0.121913	0.565954	0.579506	0.45019	0.151128	0.669734	1.24916	0.0751999	0.547534	0.301212	0.347325	0.854238	0.118812	0.267112	0.372853
RSMT2	0.329957	0.147055	0.0557372	0.150957	0.135988	1.7903	0.133489	0.389561	0.111014	0.745382	0.15928	0.444132	0.130197	0.687649	0.659067	0.455782	0.133571	0.728593	1.32479	0.084404	0.57135	0.338256	0.372539	0.991576	0.123978	0.281262	0.476511
RSMT3	0.331472	0.134325	0.0478834	0.19485	0.161631	1.68623	0.126739	0.412043	0.162144	0.706426	0.162146	0.470592	0.144608	0.657834	0.58456	0.4351	0.163407	0.771726	1.30506	0.108107	0.676775	0.349485	0.389187	0.917026	0.149212	0.320553	0.423102
SBMT1	0.33112	0.159849	0.059573	0.195094	0.154711	1.80906	0.122694	0.403341	0.138739	0.703316	0.147759	0.450562	0.111614	0.647538	0.624352	0.429334	0.178335	0.786414	1.34833	0.0876106	0.610136	0.339932	0.34492	0.906735	0.137486	0.302894	0.482184
SBMT2	0.407599	0.161596	0.0791648	0.221661	0.179792	2.46341	0.188287	0.558316	0.161016	1.0391	0.219525	0.635582	0.193114	0.888365	0.968787	0.644913	0.193541	1.00115	1.83838	0.0903586	0.7802	0.442402	0.505749	1.49847	0.167794	0.388219	0.627
SBMT3	0.412718	0.187373	0.076649	0.280164	0.221738	2.45683	0.201932	0.599437	0.196271	1.00765	0.235217	0.448278	0.214127	0.878953	0.969308	0.62937	0.206816	0.976017	1.74138	0.112072	0.824305	0.178116	0.617456	1.42856	0.0155567	0.391369	0.618074
CMT1	0.369754	0.125294	0.0712435	0.169448	0.144775	1.95143	0.130818	0.447813	0.108661	0.779321	0.154581	0.496048	0.127925	0.756843	0.713838	0.49723	0.148812	0.773601	1.35494	0.0709621	0.592587	0.360789	0.393207	1.03446	0.140502	0.31971	0.541393
CMT2	0.330085	0.178245	0.0611917	0.230348	0.201286	1.94822	0.176999	0.474222	0.174304	0.81497	0.198657	0.478121	0.17139	0.723322	0.714483	0.481407	0.215562	0.850781	1.4875	0.116632	0.69584	0.392235	0.429745	1.07576	0.16246	0.317966	0.507105
CMT3	0.419265	0.155849	0.146119	0.159316	0.141882	2.04697	0.15656	0.538527	0.113175	0.831019	0.172915	0.519017	0.163757	0.856418	0.930484	0.576064	0.129684	0.756298	1.39416	0.0661798	0.607965	0.362613	0.421304	1.21486	0.143716	0.331048	0.512503

## Sheet: Figure4
	MDS indicators		Scores				eigenvalue and variance
	SOM (g kg-1)	Actinomycetes (nmol g-1)	scores on SOM	scores on Actinomycetes			Total Variance Explained
CK1	10.2712	1.26175	0.431177	0.614149			Component	Initial Eigenvalues			Extraction Sums of Squared Loadings
CK2	11.0546	0.928486	0.464064	0.451933				Total	% of Variance	Cumulative %	Total	% of Variance	Cumulative %
CK3	12.0345	0.818686	0.505198	0.398489			1	14.8056	82.2533	82.2533	14.8056	82.2533	82.2533
RSMT1	18.1838	1.24016	0.763339	0.603638			2	1.55946	8.66369	90.917	1.55946	8.66369	90.917
RSMT2	16.8436	1.39682	0.707082	0.679888			3	0.591018	3.28343	94.2005
RSMT3	16.4565	1.38679	0.690829	0.675009			4	0.44719	2.48439	96.6849
SBMT1	21.6318	1.34712	0.908085	0.655697			5	0.3033	1.685	98.3699
SBMT2	22.028	2.05448	0.924718	1			6	0.171116	0.950645	99.3205
SBMT3	23.8214	1.83548	1	0.893406			7	0.0486492	0.270273	99.5908
CMT1	20.9719	1.49467	0.880381	0.727517			8	0.027833	0.154628	99.7454
CMT2	20.9559	1.55619	0.87971	0.757461			9	0.0199849	0.111027	99.8564
CMT3	20.6091	1.68962	0.865151	0.822408			10	0.0167542	0.0930791	99.9495
							11	0.00908753	0.0504863	100
							12	8.57754e-16	4.7653e-15	100
		SQI					13	6.30468e-16	3.5026e-15	100
	CK1	0.448559					14	3.85546e-16	2.14192e-15	100
	CK2	0.462911					15	4.78399e-17	2.65777e-16	100
	CK3	0.49506					16	-2.26733e-16	-1.25963e-15	100
	RSMT1	0.748167					17	-4.30672e-16	-2.39262e-15	100
	RSMT2	0.704498					18	-4.69081e-16	-2.60601e-15	100
	RSMT3	0.689327
	SBMT1	0.884108			Explained variance (%)	weight of each indicator
	SBMT2	0.93187		PC1	0.822533	0.904708
	SBMT3	0.989874		PC2	0.0866369	0.0952923
	CMT1	0.865859		Cumulative variance (%)	0.90917
	CMT2	0.868096
	CMT3	0.86109

## Sheet: Table1
	water content (%)	OM (g kg-1)	TN (g kg-1)	TP (g kg-1)	TK (g kg-1)	pH
soil1	16.8	15.8481	0.981818	0.711372	18.4409	6.99
soil2	17.9	15.6953	0.956166	0.915062	16.6864	6.89
soil3	18.4	14.6792	0.97481	0.801308	17.0244	6.97
RSM1	8.82	791.415	60.0474	21.32	17.89
RSM2	7.72	790.652	60.1018	18.65	20.22
RSM3	8.9	792.399	60.2556	21.95	19.01
SBM1	17.22	799.372	71.1395	12.34	21.32
SBM2	15.36	798.775	70.7444	10.08	19.95
SBM3	16.39	797.669	70.8039	11.2	22.64
CM1	71	460.67	18.6	4.81	16.83
CM2	60.03	401.45	18.3	5.86	19.42
CM3	64.04	399.3	19.1	5.01	17.09

## Sheet: Table2
		Details	CK	RSMT	SBMT	CMT	CK ($ ha-1)	RSMT ($ ha-1)	SBMT ($ ha-1)	CMT ($ ha-1)
Input	Materials	Fertilizers		1212 kg, 0.59 $ kg-1	1125 kg, 0.53 $ kg-1	10215 kg, 0.89*10-2 $ kg-1	0	715.08	596.25	90.9135
		Seed	wheat 0.74 $ kg-1, 172.5 kg ha-1; maize 1.776 $ kg-1, 37.5 kg ha-1				194.3	194.3	194.3	194.3
		Water	111 kg ha-1*2				222	222	222	222
	Equipment	Ploughing	177.6 $ ha-1				177.6	177.6	177.6	177.6
		Seeding	wheat, 66.6 $/ha; maize, 66.6 $/ha				133.2	133.2	133.2	133.2
		Harvesting	wheat, 155.4 $/ha; maize, 222.0 $/ha				377.4	377.4	377.4	377.4
	Labor	Fertilization		transportation, 10.4 $; fertilization, 10.4 $ ha-1	transportation, 10.4 $; fertilization, 10.4 $ ha-1	transportation, 52 $; fertilization, 62 $ ha-1	0	20.8	20.8	114
		Irrigation	twice, 62.2 $ ha-1*2				124.4	124.4	124.4	124.4
		Weed control	three times, 155.4 $ ha-1*3				466.2	466.2	466.2	466.2
Total input							1695.1	2430.98	2312.15	1900.01
Output	2018	Wheat	3301 kg, 0.89 $ kg-1	6368 kg, 0.89 $ kg-1	7565 kg, 0.89 $ kg-1	7454 kg, 0.89 $ kg-1	2937.89	5667.52	6732.85	6634.06
		Maize	3805 kg, 0.59 $ kg-1	7352 kg, 0.59 $ kg-1	8300 kg, 0.59 $ kg-1	8228 kg, 0.59 $ kg-1	2244.95	4337.68	4897	4854.52
							5182.84	10005.2	11629.9	11488.6
	2019	Wheat	1950 kg, 0.89 $ kg-1	4986 kg, 0.89 $ kg-1	7680 kg, 0.89 $ kg-1	6927 kg, 0.89 $ kg-1	1735.5	4437.54	6835.2	6165.03
		Maize	2013 kg, 0.59 $ kg-1	5345 kg, 0.59$ kg-1	8128 kg, 0.59 $ kg-1	7187 kg, 0.59 $ kg-1	1187.67	3153.55	4795.52	4240.33
							2923.17	7591.09	11630.7	10405.4
Annual total output							4053.01	8798.15	11630.3	10947
Annual net income							2357.9	6367.17	9318.14	9046.96
Annual yield (kg ha-1)		2018					7106.87	13719.8	15865.3	15681.3
		2019					3963.23	10330.9	15808.3	14113.5
Production cost ($ kg-1)		2018					0.238516	0.177188	0.145736	0.121164
		2019					0.427707	0.235311	0.146262	0.134624
Average production cost ($ kg-1)							0.333111	0.20625	0.145999	0.127894

## Sheet: Table3
	pH		SOM (g kg-1)		TN (g kg-1)		TP (g kg-1)		TK (g kg-1)		AN (mg kg-1)		AP (mg kg-1)		AK (mg kg-1)		MBC (mg kg-1)		MBN (mg kg-1)		Bacteria (nmol g-1)		Fungi (nmol g-1)		Actinomycetes (nmol g-1)		Arbuscular mycorrhizae fungi (nmol g-1)		Total PLFA (nmol g-1)		Soil aggregate fractions
	2018-10-09	2019-10-08	2018-10-09	2019-10-08	2018-10-09	2019-10-08	2018-10-09	2019-10-08	2018-10-09	2019-10-08	2018-10-09	2019-10-08	2018-10-09	2019-10-08	2018-10-09	2019-10-08	2018-10-09	2019-10-08	2018-10-09	2019-10-08	2018-10-09	2019-10-08	2018-10-09	2019-10-08	2018-10-09	2019-10-08	2018-10-09	2019-10-08	2018-10-09	2019-10-08	Macroaggregate	Microaggregate	Silt + Clay
CK1	6.76	6.765	13.1621	10.2712	0.812718	0.62498	0.760095	0.643314	17.2098	16.4057	48.7631	39.3738	43.4891	34.8516	131.719	121.636	84.4364	78.1509	12.8545	13.3003	9.59162	8.73357	1.01097	0.84578	0.688295	1.26175	0.427114	0.368702	11.2909	10.8411	0.350162	0.445838	0.204
CK2	6.81	6.845	14.0835	11.0546	0.770696	0.643028	0.781996	0.732003	17.0666	17.1213	43.9297	43.0829	52.1956	44.0462	126.294	121.067	88.4818	75.3588	12.9818	12.3764	9.72774	6.52167	1.10177	0.643518	0.35791	0.928486	0.4203	0.262876	11.1874	8.09368	0.399225	0.383118	0.217657
CK3	6.86	6.765	12.9103	12.0345	0.761165	0.630527	0.689837	0.67115	17.4807	17.5946	51.7592	46.659	51.9802	39.6925	128.283	127.119	91.7273	85.3497	12.9636	14.5069	5.4789	5.56161	0.586807	0.47978	0.608807	0.818686	0.205284	0.207288	6.67452	6.86008	0.484661	0.370686	0.144653
RSMT1	6.8	7	14.7398	18.1838	0.950884	1.09638	0.800553	1.01407	17.4262	17.5991	61.8075	72.361	65.8911	90.9778	139.473	230.859	106.8	135.011	17.9	23.9241	9.05786	8.93091	0.924316	0.877344	1.0164	1.24016	0.41541	0.372853	10.9986	11.0484	0.57927	0.316205	0.104525
RSMT2	6.96	7.04	15.2348	16.8436	0.886723	1.06358	0.932461	0.965634	17.7693	17.9712	60.2972	72.3235	73.9264	88.4577	143.958	247.594	116.58	138.757	17.3	22.0835	9.59162	9.5463	1.01097	1.00926	0.688295	1.39682	0.427114	0.476511	11.2909	11.9524	0.571323	0.307847	0.12083
RSMT3	6.99	7	14.7081	16.4565	0.960456	1.08116	0.747531	0.981225	17.2732	18.0861	69.1529	80.0057	64.8397	92.4899	144.731	235.394	124.55	138.908	21.4	22.7163	9.72774	9.66866	1.10177	0.936782	0.35791	1.38679	0.4203	0.423102	11.1874	11.9922	0.573172	0.298186	0.128642
SBMT1	6.98	7.02	18.6246	21.6318	1.08245	1.24388	1.09536	1.11496	18.0496	18.3246	84.4307	92.2913	103.75	122.239	162.932	272.81	126.76	241.801	20.13	38.1995	11.4256	9.63379	1.01237	1.03273	1.44162	1.34712	0.506179	0.482184	13.8795	12.0136	0.605481	0.278904	0.115615
SBMT2	6.88	6.98	17.0537	22.028	1.07873	1.14584	0.839737	1.17256	19.0117	18.7948	81.3769	89.38	108.86	119.318	161.762	263.032	123.96	240.637	21.3	38.4097	15.2807	13.2137	1.35999	1.27536	1.88205	2.05448	0.6923	0.627	18.5228	16.5435	0.630785	0.251411	0.117804
SBMT3	6.96	7.02	16.4084	23.8214	1.05513	1.21109	1.10648	1.10757	18.8116	17.9103	72.8039	88.5063	115.25	126.23	162.236	253.198	125.01	231.714	23.93	37.6765	11.6628	12.9954	1.02275	1.29481	1.47104	1.83548	0.52101	0.618074	14.1566	16.1257	0.59156	0.339893	0.0685471
CMT1	7.11	7.1	16.9939	20.9719	0.951003	1.18969	0.752926	0.963005	17.6281	17.9726	71.3252	85.6574	82.0418	98.1426	158.827	231.709	148.59	253.749	25.28	40.9778	9.87533	10.1736	0.934722	1.10769	1.11604	1.49467	0.471742	0.541393	11.9261	12.776	0.641057	0.259578	0.0993649
CMT2	7.28	7.11	16.7749	20.9559	0.997264	1.16889	0.802088	1.01261	16.9049	17.5134	74.7811	81.8225	74.4235	102.25	159.073	229.02	134.77	250.92	22.52	40.2847	12.5187	10.976	1.20632	1.07663	1.34718	1.55619	0.591441	0.507105	15.0722	13.6088	0.568838	0.310879	0.120283
CMT3	7.15	7.1	16.6929	20.6091	0.924592	1.15739	0.868286	0.959183	17.7747	17.7614	69.646	78.7026	85.7242	98.2843	156.796	228.92	132.91	231.935	20.99	38.7338	11.8644	10.9443	1.11548	1.23374	0.513642	1.68962	0.572434	0.512503	13.4936	13.8677	0.560796	0.28224	0.156964

## Sheet: Table4
	pH	SOM (g kg-1)	TN (g kg-1)	TP (g kg-1)	TK (g kg-1)	AN (mg kg-1)	AP (mg kg-1)	AK (mg kg-1)	MBC (mg kg-1)	MBN (mg kg-1)	Bacteria (nmol g-1)	Fungi (nmol g-1)	Actinomycetes (nmol g-1)	Arbuscular mycorrhizae fungi (nmol g-1)	Total PLFA (nmol g-1)	Macroaggregate	Microaggregate	Silt + Clay
CK1	6.765	10.2712	0.62498	0.643314	16.4057	39.3738	34.8516	121.636	78.1509	13.3003	8.73357	0.84578	1.26175	0.368702	10.8411	0.350162	0.445838	0.204
CK2	6.845	11.0546	0.643028	0.732003	17.1213	43.0829	44.0462	121.067	75.3588	12.3764	6.52167	0.643518	0.928486	0.262876	8.09368	0.399225	0.383118	0.217657
CK3	6.765	12.0345	0.630527	0.67115	17.5946	46.659	39.6925	127.119	85.3497	14.5069	5.56161	0.47978	0.818686	0.207288	6.86008	0.484661	0.370686	0.144653
RSMT1	7	18.1838	1.09638	1.01407	17.5991	72.361	90.9778	230.859	135.011	23.9241	8.93091	0.877344	1.24016	0.372853	11.0484	0.57927	0.316205	0.104525
RSMT2	7.04	16.8436	1.06358	0.965634	17.9712	72.3235	88.4577	247.594	138.757	22.0835	9.5463	1.00926	1.39682	0.476511	11.9524	0.571323	0.307847	0.12083
RSMT3	7	16.4565	1.08116	0.981225	18.0861	80.0057	92.4899	235.394	138.908	22.7163	9.66866	0.936782	1.38679	0.423102	11.9922	0.573172	0.298186	0.128642
SBMT1	7.02	21.6318	1.24388	1.11496	18.3246	92.2913	122.239	272.81	241.801	38.1995	9.63379	1.03273	1.34712	0.482184	12.0136	0.605481	0.278904	0.115615
SBMT2	6.98	22.028	1.14584	1.17256	18.7948	89.38	119.318	263.032	240.637	38.4097	13.2137	1.27536	2.05448	0.627	16.5435	0.630785	0.251411	0.117804
SBMT3	7.02	23.8214	1.21109	1.10757	17.9103	88.5063	126.23	253.198	231.714	37.6765	12.9954	1.29481	1.83548	0.618074	16.1257	0.59156	0.339893	0.0685471
CMT1	7.1	20.9719	1.18969	0.963005	17.9726	85.6574	98.1426	231.709	253.749	40.9778	10.1736	1.10769	1.49467	0.541393	12.776	0.641057	0.259578	0.0993649
CMT2	7.11	20.9559	1.16889	1.01261	17.5134	81.8225	102.25	229.02	250.92	40.2847	10.976	1.07663	1.55619	0.507105	13.6088	0.568838	0.310879	0.120283
CMT3	7.1	20.6091	1.15739	0.959183	17.7614	78.7026	98.2843	228.92	231.935	38.7338	10.9443	1.23374	1.68962	0.512503	13.8677	0.560796	0.28224	0.156964
Loading, eigenvalue and variance explained of principal component analysis (PCA) using eighteen soil properties.
eigenvalue and variance								Loading
Total Variance Explained								Component Matrixa
Component	Initial Eigenvalues			Extraction Sums of Squared Loadings					Component
	Total	% of Variance	Cumulative %	Total	% of Variance	Cumulative %			1	2
1	14.8056	82.2533	82.2533	14.8056	82.2533	82.2533		pH	0.859422	-0.118816
2	1.55946	8.66369	90.917	1.55946	8.66369	90.917		SOM	0.976725	-0.0177827
3	0.591018	3.28343	94.2005					TN	0.967561	-0.131867
4	0.44719	2.48439	96.6849					TP	0.952698	-0.106018
5	0.3033	1.685	98.3699					TK	0.778209	-0.41543
6	0.171116	0.950645	99.3205					AN	0.97882	-0.158733
7	0.0486492	0.270273	99.5908					AP	0.97749	-0.0660388
8	0.027833	0.154628	99.7454					AK	0.949912	-0.174729
9	0.0199849	0.111027	99.8564					MBC	0.922817	0.0587313
10	0.0167542	0.0930791	99.9495					MBN	0.923009	0.0608189
11	0.00908753	0.0504863	100					Bacteria	0.882669	0.444791
12	8.57754e-16	4.7653e-15	100					Fungi	0.906171	0.398302
13	6.30468e-16	3.5026e-15	100					Actinomycetes	0.861878	0.456591
14	3.85546e-16	2.14192e-15	100					AMF	0.920201	0.352121
15	4.78399e-17	2.65777e-16	100					Total PLFA	0.885511	0.444058
16	-2.26733e-16	-1.25963e-15	100					M	0.907351	-0.386318
17	-4.30672e-16	-2.39262e-15	100					m	-0.847564	0.391847
18	-4.69081e-16	-2.60601e-15	100					S+C	-0.792784	0.29608
Extraction Method: Principal Component Analysis.

## Sheet: Table5
Person correlation coefficients for measured 18 soil indicators.
		pH	SOM	TN	TP	TK	AN	AP	AK	MBC	MBN	Bacteria	Fungi	Actinomycetes	AMF	Total PLFA	M	m	S+C
Correlation	pH	1	0.838511	0.921768	0.779948	0.556143	0.855403	0.818666	0.839671	0.824237	0.832114	0.662413	0.761269	0.632603	0.730383	0.669848	0.811122	-0.810615	-0.63861
	SOM	0.838511	1	0.952029	0.925939	0.724388	0.957994	0.970055	0.904386	0.944918	0.949704	0.840981	0.866629	0.808204	0.876789	0.842579	0.886165	-0.795701	-0.816684
	TN	0.921768	0.952029	1	0.935596	0.722903	0.978759	0.96454	0.966889	0.884082	0.889418	0.781386	0.834783	0.739949	0.828481	0.783846	0.91344	-0.850512	-0.801769
	TP	0.779948	0.925939	0.935596	1	0.821655	0.955268	0.980846	0.964567	0.810486	0.808069	0.816701	0.810585	0.782007	0.828671	0.814658	0.884177	-0.820104	-0.780402
	TK	0.556143	0.724388	0.722903	0.821655	1	0.818314	0.786798	0.809458	0.63938	0.625112	0.540172	0.5363	0.566023	0.597273	0.544915	0.878291	-0.886226	-0.680015
	AN	0.855403	0.957994	0.978759	0.955268	0.818314	1	0.981065	0.966372	0.898435	0.895915	0.792103	0.820883	0.759013	0.840958	0.793444	0.937416	-0.87669	-0.81761
	AP	0.818666	0.970055	0.96454	0.980846	0.786798	0.981065	1	0.96285	0.88066	0.878836	0.837644	0.852419	0.796995	0.865484	0.836961	0.888166	-0.807936	-0.80487
	AK	0.839671	0.904386	0.966889	0.964567	0.809458	0.966372	0.96285	1	0.79869	0.796447	0.77106	0.803735	0.736856	0.81596	0.772265	0.913868	-0.849152	-0.804634
	MBC	0.824237	0.944918	0.884082	0.810486	0.63938	0.898435	0.88066	0.79869	1	0.997886	0.79639	0.846621	0.782432	0.860523	0.802511	0.803926	-0.780051	-0.663593
	MBN	0.832114	0.949704	0.889418	0.808069	0.625112	0.895915	0.878836	0.796447	0.997886	1	0.797228	0.84954	0.78335	0.854465	0.80361	0.806331	-0.778875	-0.670216
	Bacteria	0.662413	0.840981	0.781386	0.816701	0.540172	0.792103	0.837644	0.77106	0.79639	0.797228	1	0.969757	0.987197	0.971714	0.999476	0.638804	-0.565101	-0.600256
	Fungi	0.761269	0.866629	0.834783	0.810585	0.5363	0.820883	0.852419	0.803735	0.846621	0.84954	0.969757	1	0.962807	0.978684	0.97542	0.668127	-0.6323	-0.573104
	Actinomycetes	0.632603	0.808204	0.739949	0.782007	0.566023	0.759013	0.796995	0.736856	0.782432	0.78335	0.987197	0.962807	1	0.960177	0.990426	0.624672	-0.590456	-0.536766
	AMF	0.730383	0.876789	0.828481	0.828671	0.597273	0.840958	0.865484	0.81596	0.860523	0.854465	0.971714	0.978684	0.960177	1	0.974625	0.710019	-0.646106	-0.643219
	Total PLFA	0.669848	0.842579	0.783846	0.814658	0.544915	0.793444	0.836961	0.772265	0.802511	0.80361	0.999476	0.97542	0.990426	0.974625	1	0.642053	-0.576442	-0.592078
	M	0.811122	0.886165	0.91344	0.884177	0.878291	0.937416	0.888166	0.913868	0.803926	0.806331	0.638804	0.668127	0.624672	0.710019	0.642053	1	-0.931777	-0.87659
	m	-0.810615	-0.795701	-0.850512	-0.820104	-0.886226	-0.87669	-0.807936	-0.849152	-0.780051	-0.778875	-0.565101	-0.6323	-0.590456	-0.646106	-0.576442	-0.931777	1	0.642082
	S+C	-0.63861	-0.816684	-0.801769	-0.780402	-0.680015	-0.81761	-0.80487	-0.804634	-0.663593	-0.670216	-0.600256	-0.573104	-0.536766	-0.643219	-0.592078	-0.87659	0.642082	1
